# Supplementary material for: Quantitation of thiol metabolites from mammalian cells using fluorous tagging and HILIC-MS
Source: Royal Society of Chemistry journal article supplement (doi:10.1039/c5ay00603a), 2015-01-01

Electronic Supplementary Information

S1 Fragmentation patterns for tagged biological thiols corresponding to Figure 4.

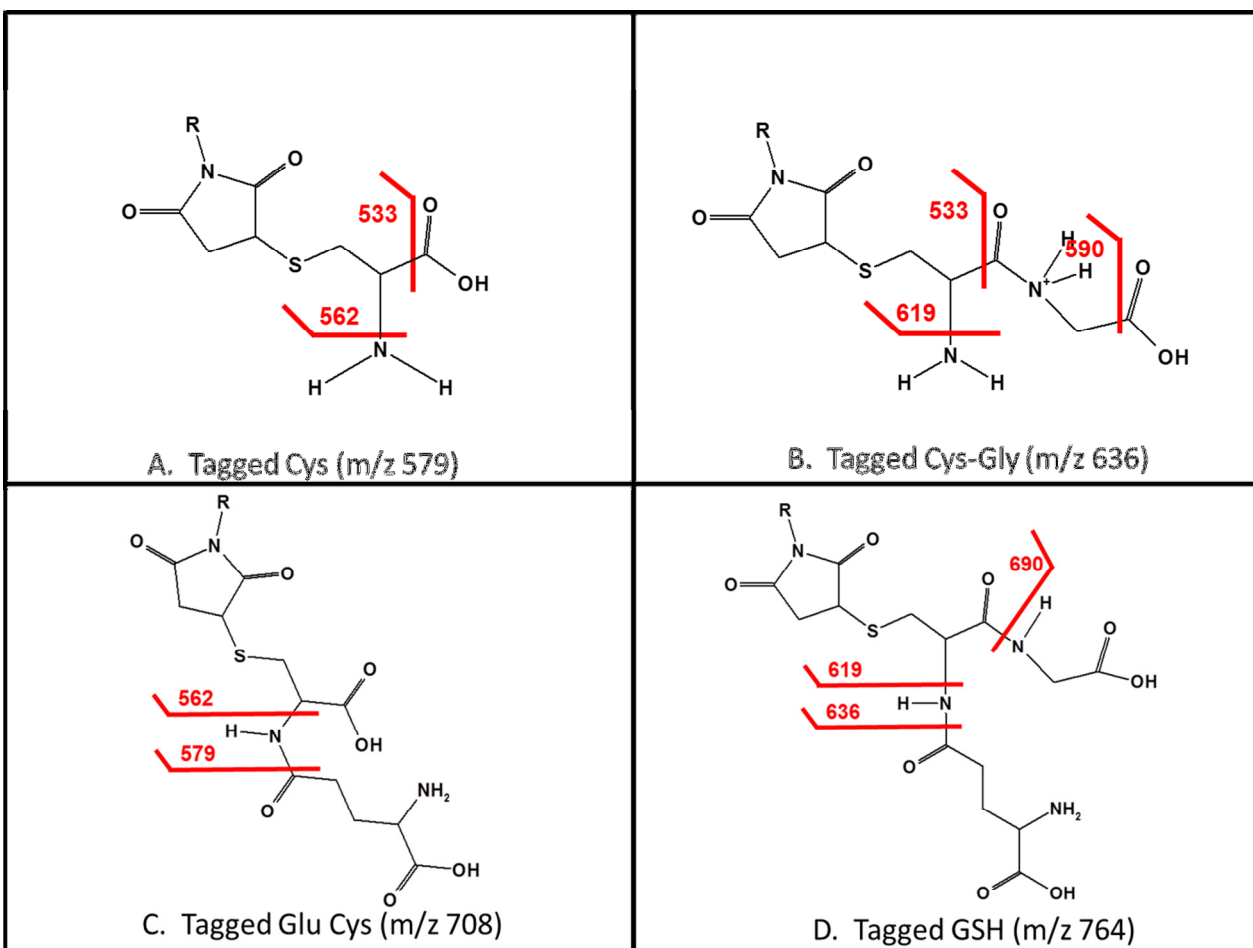

Supplement: c5ay00603a1.pdf [file c5ay00603a1.pdf]
